# Supplementary material for: Carbon nanotube scaffolds with controlled porosity as electromagnetic absorbing materials in the gigahertz range
Source: Royal Society of Chemistry journal article supplement (doi:10.1039/c6nr02133f), 2016-01-01
Supplement: c6nr02133f1.pdf [file c6nr02133f1.pdf]

**SUPPLEMENTARY INFORMATION.**

**Carbon nanotube scaffolds with controlled porosity as electromagnetic absorbers  
materials in the gigahertz range**

*Marta González, María Crespo, Juan Baselga, Javier Pozuelo\**

Departamento de Ciencia e Ingeniería de Materiales e Ingeniería Química (IAAB),  
Universidad Carlos III de Madrid, 28911 Leganés, Madrid, Spain.

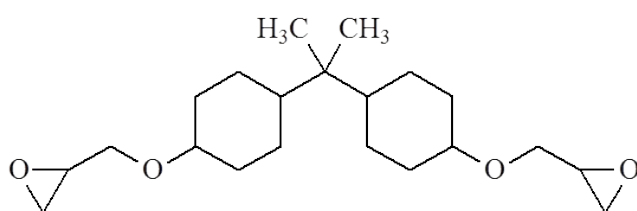

HDGEBA

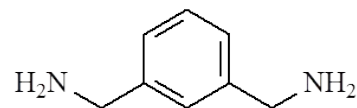

m-Xylylenediamine

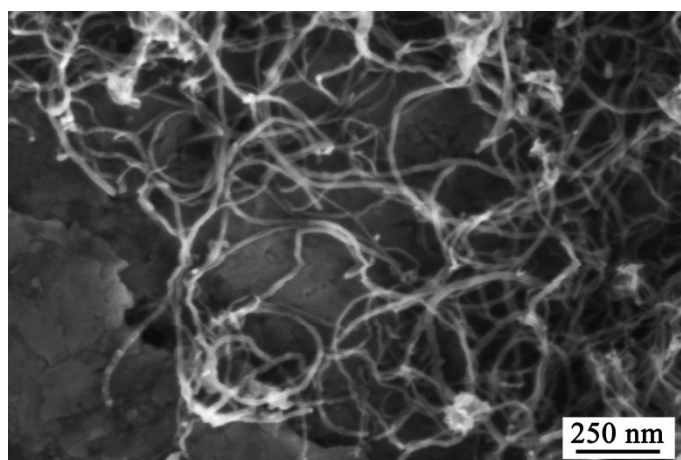

**Figure 1SI.** Hydrogenated Bisphenol A diglycidyl ether (HDGEBA) and m-Xylylenediamine. FESEM image of pristine CNT.

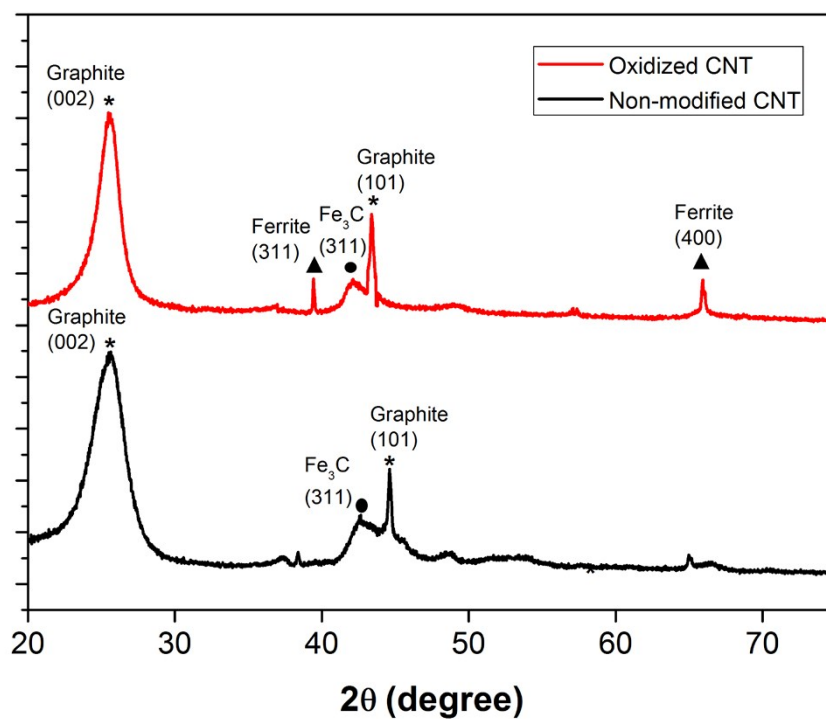

**Figure 2SI.** X-Ray diffractograms of pristine CNT (black), UV/H<sub>2</sub>O<sub>2</sub> oxidized CNT (red).

**Table 1SI.** Glass transition temperatures of CNT:HDGEBA:mXD composites. Glass transition of bulk HDGEBAmXD was 77.6 °C.

| CNT content, % | Glass Transition (T <sub>g</sub> ), °C |               |
|----------------|----------------------------------------|---------------|
|                | Slow freezing                          | Fast freezing |
| 3              | 75.2                                   | 74.7          |
| 4              | 75.3                                   | 75.3          |
| 6              | 77.7                                   | 76.8          |
| 7              | 78.2                                   | 77.6          |

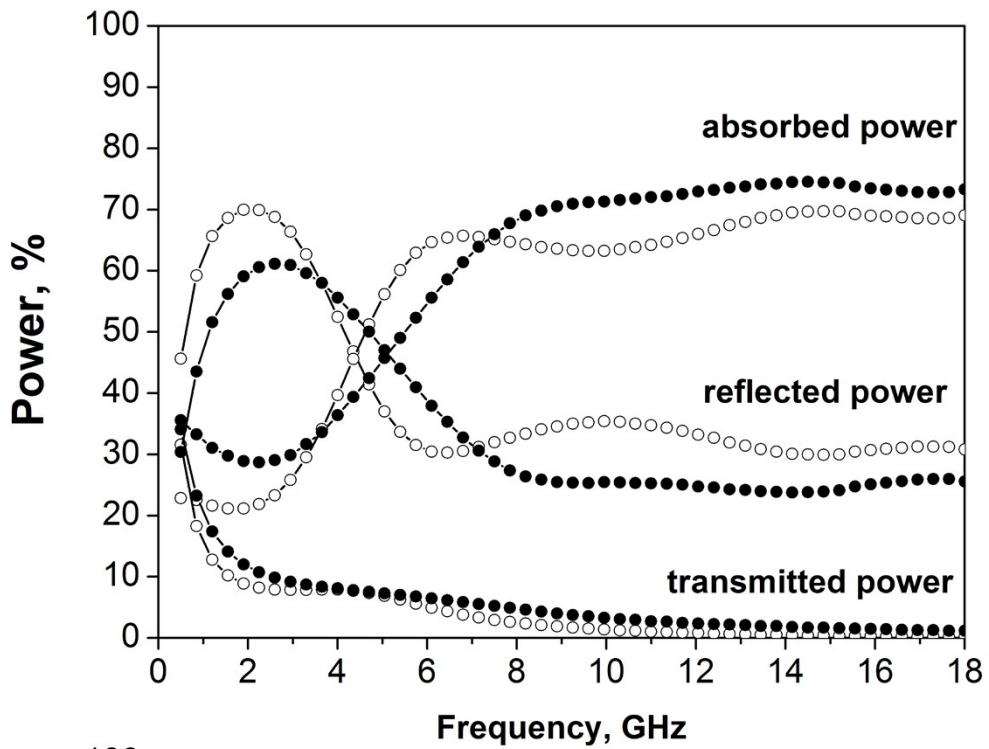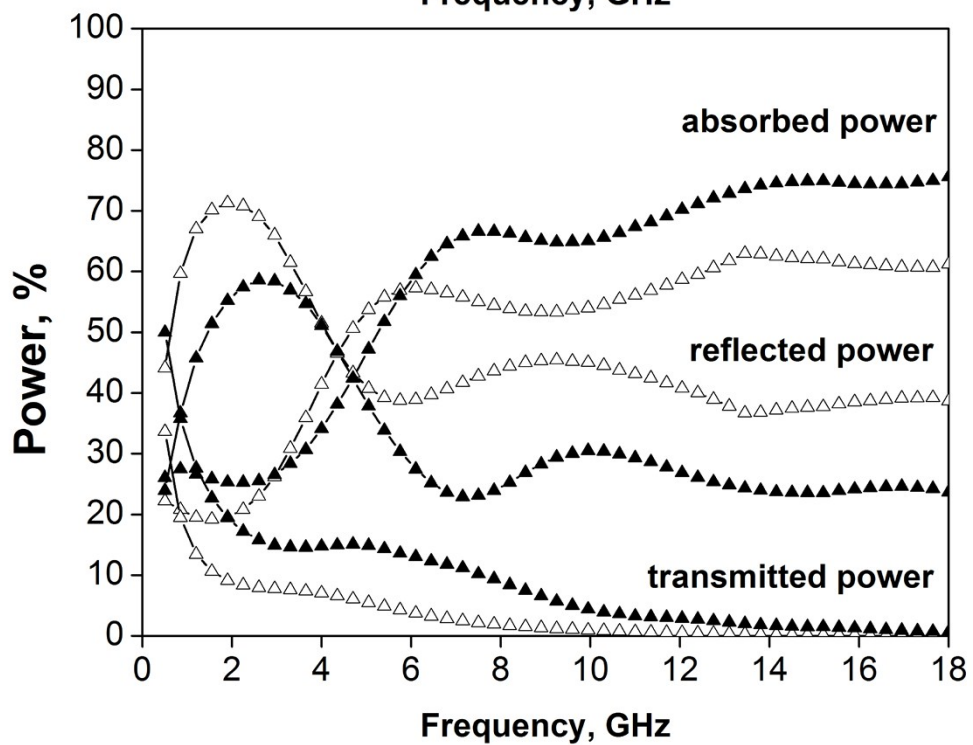

**Figure 3SI.** Reflected, absorbed and transmitted powers with CNT compositions of 4 and 6%. CNT4%-Slow (●), CNT4%-Fast (○), CNT6%-Slow (▲), CNT6%-Fast (Δ). Composites Thickness of 5mm.

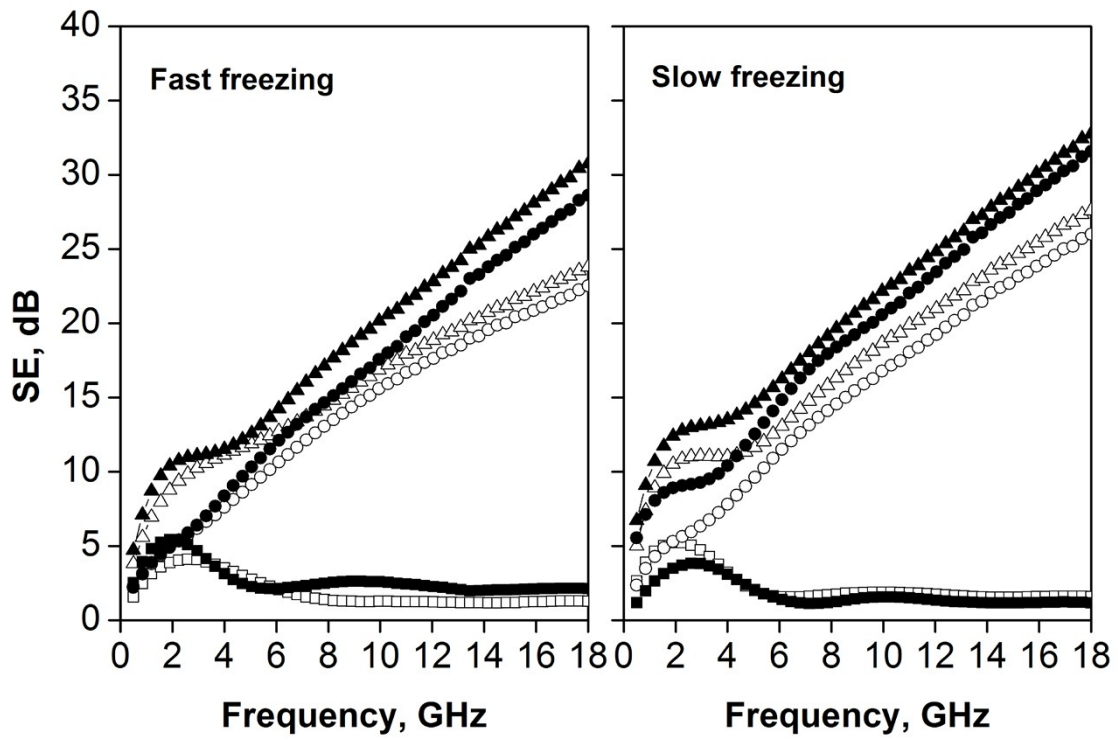

**Figure 4SI.** Electromagnetic efficiency in frequency range of 1-18 GHz with CNT percentages of: 4% (SE<sub>R</sub> (□), SE<sub>A</sub> (○), SE<sub>T</sub> (Δ)) and 6% (SE<sub>R</sub> (■), SE<sub>A</sub> (●), SE<sub>T</sub> (▲)). Composites thickness: 5mm.
